# Supplementary material for: Cytotoxic platinum(ii) intercalators that incorporate 1R,2R-diaminocyclopentane
Source: Royal Society of Chemistry journal article supplement (doi:10.1039/c2dt31323e), 2012-09-07
Supplement: c2dt31323e.pdf [file c2dt31323e.pdf]

# **Cytotoxic platinum(II) intercalators that incorporate 1*R*,2*R*- diaminocyclopentane**

## **Supplementary material**

K. Benjamin Garbutcheon-Singh<sup>a</sup>, Peter Leverett<sup>a</sup>, Simon Myers<sup>a</sup> and Janice R. Aldrich-Wright<sup>a\*</sup>

a) Nanoscale Organisation and Dynamics Group

School of Science and Health

University of Western Sydney

Locked Bag 1797

Penrith South DC, 2751, NSW

Australia

\* Please address editorial correspondence to Prof. Janice R. Aldrich-Wright via e-mail:

[j.aldrich-wright@uws.edu.au](mailto:j.aldrich-wright@uws.edu.au) or via facsimile: +61 2 4620 3025.

**Table S1:** Fractional Atomic Coordinates ( $\times 10^4$ ) and Equivalent Isotropic Displacement Parameters ( $\text{\AA}^2 \times 10^3$ ) for **1**.  $U_{eq}$  is defined as 1/3 of the trace of the orthogonalised  $U_{ij}$  tensor.

| Atom | x           | y         | z            | U(eq)    |
|------|-------------|-----------|--------------|----------|
| C1   | 2826(3)     | 6580(20)  | 9546(3)      | 20.3(8)  |
| C2   | 3000(3)     | 6606(18)  | 8413(3)      | 19.9(8)  |
| C3   | 4108(3)     | 6575(19)  | 8097(3)      | 20.0(8)  |
| C4   | 5075(3)     | 6620(20)  | 8937(3)      | 17.3(7)  |
| C5   | 4840(3)     | 6580(20)  | 10060(3)     | 16.1(7)  |
| C6   | 5768(3)     | 6605(18)  | 10950(3)     | 16.8(7)  |
| C7   | 6944(3)     | 6630(20)  | 10720(3)     | 18.3(8)  |
| C8   | 7818(3)     | 6540(20)  | 11648(3)     | 21.9(8)  |
| C9   | 7485(3)     | 6630(20)  | 12703(3)     | 22.9(9)  |
| C10  | 6295(3)     | 6560(30)  | 12875(3)     | 20.9(8)  |
| C11  | 6286(3)     | 6610(18)  | 8721(3)      | 19.5(8)  |
| C12  | 7173(3)     | 6581(19)  | 9570(3)      | 20.1(7)  |
| C13  | 2579(4)     | 6891(18)  | 14057(3)     | 28(2)    |
| C14  | 1779(4)     | 5674(9)   | 13235(4)     | 24.1(11) |
| C15  | 610(4)      | 5832(9)   | 13713(4)     | 29.7(14) |
| C16  | 987(5)      | 5681(14)  | 14977(5)     | 63(3)    |
| C17  | 2283(4)     | 6220(20)  | 15197(4)     | 40(3)    |
| Cl1  | 5852.1(9)   | 6745(5)   | 5768.6(8)    | 29.5(4)  |
| N1   | 3720(2)     | 6581(19)  | 10362(2)     | 15.9(6)  |
| N2   | 5457(2)     | 6623(19)  | 12007(2)     | 16.3(7)  |
| N3   | 3773(3)     | 6620(20)  | 13754(2)     | 28.6(9)  |
| N4   | 1915(2)     | 6540(20)  | 12110(2)     | 22.4(7)  |
| Cl2  | 9798.8(11)  | 5511(2)   | 8054.8(11)   | 31.6(3)  |
| Pt1  | 3704.58(10) | 6619.1(4) | 12050.04(10) | 15.88(5) |
| O1W  | 10177(3)    | 4518(6)   | 10601(3)     | 31.8(9)  |
| O2W  | 1587(7)     | 1210(30)  | 14572(7)     | 52(4)    |
| C1   | 2826(3)     | 6580(20)  | 9546(3)      | 20.3(8)  |
| C2   | 3000(3)     | 6606(18)  | 8413(3)      | 19.9(8)  |
| C3   | 4108(3)     | 6575(19)  | 8097(3)      | 20.0(8)  |
| C4   | 5075(3)     | 6620(20)  | 8937(3)      | 17.3(7)  |
| C5   | 4840(3)     | 6580(20)  | 10060(3)     | 16.1(7)  |
| C6   | 5768(3)     | 6605(18)  | 10950(3)     | 16.8(7)  |
| C7   | 6944(3)     | 6630(20)  | 10720(3)     | 18.3(8)  |
| C8   | 7818(3)     | 6540(20)  | 11648(3)     | 21.9(8)  |
| C9   | 7485(3)     | 6630(20)  | 12703(3)     | 22.9(9)  |
| C10  | 6295(3)     | 6560(30)  | 12875(3)     | 20.9(8)  |
| C11  | 6286(3)     | 6610(18)  | 8721(3)      | 19.5(8)  |
| C12  | 7173(3)     | 6581(19)  | 9570(3)      | 20.1(7)  |
| C13  | 2579(4)     | 6891(18)  | 14057(3)     | 28(2)    |
| C14  | 1779(4)     | 5674(9)   | 13235(4)     | 24.1(11) |
| C15  | 610(4)      | 5832(9)   | 13713(4)     | 29.7(14) |
| C16  | 987(5)      | 5681(14)  | 14977(5)     | 63(3)    |
| C17  | 2283(4)     | 6220(20)  | 15197(4)     | 40(3)    |
| Cl1  | 5852.1(9)   | 6745(5)   | 5768.6(8)    | 29.5(4)  |
| N1   | 3720(2)     | 6581(19)  | 10362(2)     | 15.9(6)  |
| N2   | 5457(2)     | 6623(19)  | 12007(2)     | 16.3(7)  |
| N3   | 3773(3)     | 6620(20)  | 13754(2)     | 28.6(9)  |

**Table S1:** Continued

| Atom | x         | y        | z         | U(eq)    |
|------|-----------|----------|-----------|----------|
| N4   | 1915(2)   | 6540(20) | 12110(2)  | 22.4(7)  |
| C13  | 2579(4)   | 6891(18) | 14057(3)  | 28(2)    |
| C14  | 1779(4)   | 5674(9)  | 13235(4)  | 24.1(11) |
| C15  | 610(4)    | 5832(9)  | 13713(4)  | 29.7(14) |
| C16  | 987(5)    | 5681(14) | 14977(5)  | 63(3)    |
| C17  | 2283(4)   | 6220(20) | 15197(4)  | 40(3)    |
| C11  | 5852.1(9) | 6745(5)  | 5768.6(8) | 29.5(4)  |
| N1   | 3720(2)   | 6581(19) | 10362(2)  | 15.9(6)  |
| N2   | 5457(2)   | 6623(19) | 12007(2)  | 16.3(7)  |
| N3   | 3773(3)   | 6620(20) | 13754(2)  | 28.6(9)  |
| N4   | 1915(2)   | 6540(20) | 12110(2)  | 22.4(7)  |
| C13  | 2579(4)   | 6891(18) | 14057(3)  | 28(2)    |
| C14  | 1779(4)   | 5674(9)  | 13235(4)  | 24.1(11) |

**Table S2:** Bond Lengths for **1**.

| Atom | Atom | Length/Å | Atom | Atom | Length/Å |
|------|------|----------|------|------|----------|
| C1   | C2   | 1.398(5) | C10  | N2   | 1.336(4) |
| C1   | N1   | 1.335(4) | C11  | C12  | 1.356(5) |
| C2   | C3   | 1.369(5) | C13  | C14  | 1.507(9) |
| C3   | C4   | 1.413(5) | C13  | C17  | 1.517(8) |
| C4   | C5   | 1.405(4) | C13  | N3   | 1.470(6) |
| C4   | C11  | 1.443(5) | C14  | C15  | 1.522(6) |
| C5   | C6   | 1.420(5) | C14  | N4   | 1.495(7) |
| C5   | N1   | 1.376(4) | C15  | C16  | 1.534(7) |
| C6   | C7   | 1.409(5) | C16  | C17  | 1.524(8) |
| C6   | N2   | 1.357(4) | N1   | Pt1  | 2.029(3) |
| C7   | C8   | 1.413(5) | N2   | Pt1  | 2.018(3) |
| C7   | C12  | 1.435(5) | N3   | Pt1  | 2.039(3) |
| C8   | C9   | 1.365(5) | N4   | Pt1  | 2.064(3) |

**Table S3:** Bond Angles of **1**.

| Atom | Atom | Atom | Angle/°  | Atom | Atom | Atom | Angle/°   |
|------|------|------|----------|------|------|------|-----------|
| N1   | C1   | C2   | 122.1(3) | N3   | C13  | C17  | 119.8(6)  |
| C3   | C2   | C1   | 120.6(3) | C13  | C14  | C15  | 102.3(4)  |
| C2   | C3   | C4   | 118.9(3) | N4   | C14  | C13  | 105.3(6)  |
| C3   | C4   | C11  | 124.5(3) | N4   | C14  | C15  | 120.1(4)  |
| C5   | C4   | C3   | 117.6(3) | C14  | C15  | C16  | 102.0(4)  |
| C5   | C4   | C11  | 117.9(3) | C17  | C16  | C15  | 108.4(4)  |
| C4   | C5   | C6   | 120.8(3) | C13  | C17  | C16  | 103.2(4)  |
| N1   | C5   | C4   | 122.8(3) | C1   | N1   | C5   | 118.0(3)  |
| N1   | C5   | C6   | 116.4(3) | C1   | N1   | Pt1  | 129.7(2)  |
| C7   | C6   | C5   | 120.4(3) | C5   | N1   | Pt1  | 112.2(2)  |
| N2   | C6   | C5   | 116.7(3) | C6   | N2   | Pt1  | 113.1(2)  |
| N2   | C6   | C7   | 122.9(3) | C10  | N2   | C6   | 119.1(3)  |
| C6   | C7   | C8   | 117.0(3) | C10  | N2   | Pt1  | 127.7(2)  |
| C6   | C7   | C12  | 118.2(3) | C13  | N3   | Pt1  | 108.5(3)  |
| C8   | C7   | C12  | 124.5(3) | C14  | N4   | Pt1  | 104.4(3)  |
| C9   | C8   | C7   | 118.8(3) | N1   | Pt1  | N3   | 177.2(2)  |
| C8   | C9   | C10  | 121.0(3) | N1   | Pt1  | N4   | 98.99(11) |
| N2   | C10  | C9   | 120.7(3) | N2   | Pt1  | N1   | 81.52(11) |
| C12  | C11  | C4   | 121.4(3) | N2   | Pt1  | N3   | 95.80(11) |
| C11  | C12  | C7   | 121.2(3) | N2   | Pt1  | N4   | 178.5(6)  |
| C14  | C13  | C17  | 104.4(7) | N3   | Pt1  | N4   | 83.68(12) |
| N3   | C13  | C14  | 106.6(6) |      |      |      |           |

Symmetry transformations used to generate equivalent atoms:

#1 x,y,z

#2 -x,1/2+y,-z

**Table S4:** Anisotropic Displacement Parameters ( $\text{\AA}^2 \times 10^3$ ) for **1**. The Anisotropic displacement factor exponent takes the form:  $-2\pi^2[h^2a^{*2}U_{11} + \dots + 2hka \times b \times U_{12}]$ .

| Atom | $U_{11}$ | $U_{22}$ | $U_{33}$ | $U_{23}$ | $U_{13}$ | $U_{12}$  |
|------|----------|----------|----------|----------|----------|-----------|
| C1   | 20.0(16) | 20(2)    | 21.0(17) | 12(5)    | 1.6(14)  | 3(5)      |
| C2   | 24.9(17) | 15(2)    | 17.7(16) | -8(5)    | -4.4(14) | 2(5)      |
| C3   | 29.0(19) | 17(2)    | 14.4(15) | 2(5)     | 2.5(14)  | 10(5)     |
| C4   | 25.0(17) | 10(2)    | 17.0(15) | -4(5)    | 4.4(13)  | -3(5)     |
| C5   | 20.5(16) | 10.7(18) | 16.6(15) | 4(5)     | 0.5(13)  | 5(5)      |
| C6   | 18.3(16) | 14.3(19) | 17.7(15) | -1(5)    | 1.5(13)  | -3(5)     |
| C7   | 21.8(16) | 12(2)    | 21.6(16) | -2(5)    | 2.6(14)  | 3(5)      |
| C8   | 19.0(16) | 18(2)    | 27.9(18) | -4(6)    | 0.7(14)  | -1(5)     |
| C9   | 20.0(17) | 27(2)    | 19.7(16) | 2(5)     | -6.1(14) | -3(5)     |
| C10  | 22.8(17) | 21(2)    | 18.2(16) | 1(5)     | -0.9(14) | -4(4)     |
| C11  | 27.7(18) | 14(2)    | 17.0(15) | 4(5)     | 5.1(14)  | 5(5)      |
| C12  | 20.5(16) | 17(2)    | 23.9(17) | 6(5)     | 7.1(14)  | -1(5)     |
| C13  | 25(2)    | 40(8)    | 18.1(18) | 0(3)     | 2.5(16)  | 0(3)      |
| C14  | 21(2)    | 34(3)    | 17(2)    | 7(2)     | 1.7(18)  | -2(2)     |
| C15  | 19(2)    | 45(4)    | 26(2)    | 9(2)     | 5.1(19)  | 2(2)      |
| C16  | 29(3)    | 131(9)   | 30(3)    | 23(4)    | 9(2)     | 4(3)      |
| C17  | 33(2)    | 67(10)   | 19(2)    | 5(3)     | 1.8(18)  | 6(3)      |
| Cl1  | 30.6(5)  | 39.3(11) | 17.3(4)  | 1.7(9)   | -3.2(4)  | -4.2(10)  |
| N1   | 19.0(13) | 13.4(16) | 15.4(13) | 7(4)     | 1.5(11)  | 1(5)      |
| N2   | 14.1(13) | 17.3(19) | 16.8(13) | -6(4)    | -1.7(11) | -1(4)     |
| N3   | 18.5(15) | 51(3)    | 15.6(14) | -6(5)    | -0.4(12) | -8(5)     |
| N4   | 18.3(14) | 34(2)    | 15.0(14) | 5(5)     | 0.9(11)  | 4(5)      |
| Cl2  | 32.6(6)  | 30.9(8)  | 31.9(6)  | -2.5(6)  | 7.0(5)   | -3.7(6)   |
| Pt1  | 15.21(7) | 19.68(9) | 12.47(7) | 0.44(18) | 0.36(5)  | -0.69(18) |
| O1W  | 31.7(19) | 29(2)    | 34.0(19) | -1.4(17) | -1.6(16) | 0.0(17)   |
| O2W  | 49(4)    | 53(13)   | 54(4)    | 0(5)     | 8(4)     | 4(5)      |

**Table S5:** Hydrogen Atom Coordinates ( $\text{\AA}^2 \times 10^4$ ) and Isotropic Displacement Parameters ( $\text{\AA}^2 \times 10^3$ ) for **1**.

| Atom | x    | y    | z     | U(eq) |
|------|------|------|-------|-------|
| H1   | 2064 | 6554 | 9738  | 24    |
| H2   | 2356 | 6646 | 7868  | 24    |
| H3   | 4222 | 6528 | 7343  | 24    |
| H8   | 8605 | 6427 | 11543 | 26    |
| H9   | 8054 | 6734 | 13317 | 27    |
| H10  | 6090 | 6478 | 13600 | 25    |
| H11  | 6462 | 6625 | 7984  | 23    |
| H12  | 7944 | 6526 | 9404  | 24    |
| H13  | 2366 | 8305 | 13959 | 33    |
| H14  | 2040 | 4278 | 13260 | 29    |
| H15A | 89   | 4746 | 13451 | 36    |
| H15B | 228  | 7098 | 13518 | 36    |
| H16A | 527  | 6594 | 15378 | 75    |
| H16B | 859  | 4333 | 15236 | 75    |
| H17A | 2412 | 7282 | 15745 | 48    |
| H17B | 2748 | 5063 | 15462 | 48    |
| H3A  | 4070 | 5449 | 14032 | 34    |
| H3B  | 4240 | 7613 | 14045 | 34    |
| H4A  | 1607 | 7779 | 12043 | 27    |
| H4B  | 1562 | 5766 | 11558 | 27    |

**Table S6:** Torsion Angles for **1**.

| <b>A</b> | <b>B</b> | <b>C</b> | <b>D</b> | <b>Angle/°</b> | <b>A</b> | <b>B</b> | <b>C</b> | <b>D</b> | <b>Angle/°</b> |
|----------|----------|----------|----------|----------------|----------|----------|----------|----------|----------------|
| C1       | C2       | C3       | C4       | -3.2(19)       | C8       | C9       | C10      | N2       | -7(2)          |
| C1       | N1       | Pt1      | N2       | -179.4(13)     | C9       | C10      | N2       | C6       | 5(2)           |
| C1       | N1       | Pt1      | N3       | 164(13)        | C9       | C10      | N2       | Pt1      | -178.3(12)     |
| C1       | N1       | Pt1      | N4       | 2.0(13)        | C10      | N2       | Pt1      | N1       | -177.0(15)     |
| C2       | C1       | N1       | C5       | -1.0(19)       | C10      | N2       | Pt1      | N3       | 2.2(15)        |
| C2       | C1       | N1       | Pt1      | 178.1(10)      | C10      | N2       | Pt1      | N4       | -67(11)        |
| C2       | C3       | C4       | C5       | 3(2)           | C11      | C4       | C5       | C6       | 2(2)           |
| C2       | C3       | C4       | C11      | -179.4(13)     | C11      | C4       | C5       | N1       | -179.8(12)     |
| C3       | C4       | C5       | C6       | 179.5(13)      | C12      | C7       | C8       | C9       | 179.3(12)      |
| C3       | C4       | C5       | N1       | -2(2)          | C13      | C14      | C15      | C16      | -39.4(7)       |
| C3       | C4       | C11      | C12      | -177.7(13)     | C13      | C14      | N4       | Pt1      | 50.8(7)        |
| C4       | C5       | C6       | C7       | -0.8(19)       | C13      | N3       | Pt1      | N1       | -171(13)       |
| C4       | C5       | C6       | N2       | 178.3(13)      | C13      | N3       | Pt1      | N2       | 172.3(10)      |
| C4       | C5       | N1       | C1       | 1(2)           | C13      | N3       | Pt1      | N4       | -9.1(9)        |
| C4       | C5       | N1       | Pt1      | -178.2(11)     | C14      | C13      | C17      | C16      | -31.3(9)       |
| C4       | C11      | C12      | C7       | -2.4(19)       | C14      | C13      | N3       | Pt1      | 39.8(10)       |
| C5       | C4       | C11      | C12      | 0(2)           | C14      | C15      | C16      | C17      | 20.5(8)        |
| C5       | C6       | C7       | C8       | -176.6(12)     | C14      | N4       | Pt1      | N1       | 155.9(7)       |
| C5       | C6       | C7       | C12      | -1.8(18)       | C14      | N4       | Pt1      | N2       | 46(11)         |
| C5       | C6       | N2       | C10      | 177.4(14)      | C14      | N4       | Pt1      | N3       | -23.3(7)       |
| C5       | C6       | N2       | Pt1      | -0.1(14)       | C15      | C14      | N4       | Pt1      | 165.3(5)       |
| C5       | N1       | Pt1      | N2       | -0.2(10)       | C15      | C16      | C17      | C13      | 6.3(10)        |
| C5       | N1       | Pt1      | N3       | -16(14)        | C17      | C13      | C14      | C15      | 44.9(7)        |
| C5       | N1       | Pt1      | N4       | -178.8(10)     | C17      | C13      | C14      | N4       | 171.2(7)       |
| C6       | C5       | N1       | C1       | 179.5(12)      | C17      | C13      | N3       | Pt1      | 157.8(9)       |
| C6       | C5       | N1       | Pt1      | 0.2(15)        | N1       | C1       | C2       | C3       | 2.1(19)        |
| C6       | C7       | C8       | C9       | -6.3(18)       | N1       | C5       | C6       | C7       | -179.2(12)     |
| C6       | C7       | C12      | C11      | 3.5(18)        | N1       | C5       | C6       | N2       | -0.1(18)       |
| C6       | N2       | Pt1      | N1       | 0.2(9)         | N2       | C6       | C7       | C8       | 4.3(19)        |
| C6       | N2       | Pt1      | N3       | 179.4(10)      | N2       | C6       | C7       | C12      | 179.1(12)      |
| C6       | N2       | Pt1      | N4       | 110(10)        | N3       | C13      | C14      | C15      | 172.7(7)       |
| C7       | C6       | N2       | C10      | -4(2)          | N3       | C13      | C14      | N4       | -61.1(9)       |
| C7       | C6       | N2       | Pt1      | 179.0(10)      | N3       | C13      | C17      | C16      | -150.4(10)     |
| C7       | C8       | C9       | C10      | 8(2)           | N4       | C14      | C15      | C16      | -155.4(7)      |
| C8       | C7       | C12      | C11      | 177.8(13)      |          |          |          |          |                |

**Table S7:** Fractional Atomic Coordinates ( $\times 10^4$ ) and Equivalent Isotropic Displacement Parameters ( $\text{\AA}^2 \times 10^3$ ) for [PHENSS]Cl<sub>2</sub>. U<sub>eq</sub> is defined as 1/3 of the trace of the orthogonalised U<sub>ij</sub> tensor.

| Atom  | x        | y        | z        | U(eq) |
|-------|----------|----------|----------|-------|
| Pt    | 8748(1)  | 6866(1)  | 2240(1)  | 14(1) |
| N(1)  | 10450(2) | 6902(13) | 1946(2)  | 19(1) |
| N(2)  | 8597(2)  | 6865(13) | 622(2)   | 18(1) |
| C(1)  | 7633(3)  | 6885(14) | -16(2)   | 22(1) |
| C(2)  | 7675(3)  | 6871(13) | -1133(2) | 27(1) |
| C(3)  | 8707(3)  | 6936(14) | -1601(2) | 26(1) |
| C(4)  | 9747(3)  | 6936(15) | -948(2)  | 22(1) |
| C(12) | 9638(2)  | 6936(11) | 160(2)   | 17(1) |
| C(11) | 10641(2) | 6861(13) | 875(2)   | 19(1) |
| C(5)  | 10882(3) | 6974(11) | -1348(3) | 25(1) |
| C(6)  | 11845(3) | 6920(18) | -661(3)  | 30(1) |
| C(7)  | 11748(3) | 6930(15) | 477(3)   | 24(1) |
| C(8)  | 12697(3) | 6870(14) | 1226(3)  | 30(1) |
| C(9)  | 12501(3) | 6849(13) | 2293(3)  | 31(1) |
| C(10) | 11372(2) | 6870(20) | 2643(2)  | 26(1) |
| N(3)  | 7034(2)  | 6765(13) | 2511(2)  | 18(1) |
| N(4)  | 8913(2)  | 6895(14) | 3861(2)  | 22(1) |
| C(13) | 7815(3)  | 6219(6)  | 4306(3)  | 22(1) |
| C(14) | 7748(3)  | 6533(13) | 5506(3)  | 30(2) |
| C(15) | 6554(4)  | 5881(8)  | 5826(3)  | 40(1) |
| C(16) | 5602(3)  | 6980(20) | 5204(3)  | 38(1) |
| C(17) | 5671(3)  | 6685(17) | 3999(3)  | 28(1) |
| C(18) | 6853(3)  | 7241(6)  | 3656(3)  | 21(1) |
| Cl(1) | 11076(1) | 6393(2)  | 5571(1)  | 37(1) |
| Cl(2) | 5250(1)  | 9901(2)  | 1445(1)  | 29(1) |
| W(1)  | 5330(3)  | 4492(6)  | 1045(3)  | 43(1) |



**Table S8:** Bonds Lengths of [PHENSS]Cl<sub>2</sub>.

| Atom | Atom | Length/Å  | Atom | Atom | Length/Å  |
|------|------|-----------|------|------|-----------|
| PT   | N1   | 2.0239(1) | C10  | H10  | 0.9300(1) |
| PT   | N2   | 2.0227(1) | N3   | H3A  | 0.9       |
| PT   | N3   | 2.0330(1) | N3   | H3B  | 0.9       |
| PT   | N4   | 2.0259(1) | N3   | C18  | 1.4963(1) |
| N1   | C11  | 1.3695(1) | N4   | H4A  | 0.9       |
| N1   | C10  | 1.3411(1) | N4   | H4B  | 0.9       |
| N2   | C1   | 1.3350(1) | N4   | C13  | 1.4925(1) |
| N2   | C12  | 1.3659(1) | C13  | H13  | 0.9800(1) |
| C1   | H1   | 0.93      | C13  | C14  | 1.5234(1) |
| C1   | C2   | 1.4017(1) | C13  | C18  | 1.5216(1) |
| C2   | H2   | 0.93      | C14  | H14A | 0.9700(1) |
| C2   | C3   | 1.3587(1) | C14  | H14B | 0.97      |
| C3   | H3   | 0.9300(1) | C14  | C15  | 1.5296(1) |
| C3   | C4   | 1.4176(1) | C15  | H15A | 0.9700(1) |
| C4   | C12  | 1.3984(1) | C15  | H15B | 0.9700(1) |
| C4   | C5   | 1.4321(1) | C15  | C16  | 1.5213(1) |
| C12  | C11  | 1.4274(1) | C16  | H16A | 0.9700(1) |
| C11  | C7   | 1.4007(1) | C16  | H16B | 0.97      |
| C5   | H5   | 0.9300(1) | C16  | C17  | 1.5272(1) |
| C5   | C6   | 1.3711(1) | C17  | H17A | 0.9700(1) |
| C6   | H6   | 0.93      | C17  | H17B | 0.97      |
| C6   | C7   | 1.4338(1) | C17  | C18  | 1.5068(1) |
| C7   | C8   | 1.4049(1) | C18  | H18  | 0.9800(1) |
| C8   | H8   | 0.93      | W1   | HW1A | 0.8981(1) |
| C8   | C9   | 1.3665(1) | W1   | HW1B | 0.759     |
| C9   | H9   | 0.93      | W2   | HW2A | 0.8994    |
| C9   | C10  | 1.4009(1) | W2   | HW2B | 0.77      |

**Table S9:** Bond Angles of [PHENSS]Cl<sub>2</sub>.

| Atom | Atom | Atom | Angle/° | Atom | Atom | Atom | Angle/° |
|------|------|------|---------|------|------|------|---------|
| N1   | Pt   | N2   | 81.38   | Pt   | N3   | H3B  | 109.68  |
| N1   | Pt   | N3   | 178.43  | Pt   | N3   | C18  | 109.91  |
| N1   | Pt   | N4   | 98.19   | H3A  | N3   | H3B  | 108.18  |
| N2   | Pt   | N3   | 97.71   | H3A  | N3   | C18  | 109.68  |
| N2   | Pt   | N4   | 179.3   | H3B  | N3   | C18  | 109.68  |
| N3   | Pt   | N4   | 82.73   | Pt   | N4   | H4A  | 109.77  |
| Pt   | N1   | C11  | 112.87  | Pt   | N4   | H4B  | 109.77  |
| Pt   | N1   | C10  | 129.04  | Pt   | N4   | C13  | 109.52  |
| C11  | N1   | C10  | 118     | H4A  | N4   | H4B  | 108.23  |
| Pt   | N2   | C1   | 128.45  | H4A  | N4   | C13  | 109.77  |
| Pt   | N2   | C12  | 113.1   | H4B  | N4   | C13  | 109.77  |
| C1   | N2   | C12  | 118.38  | N4   | C13  | H13  | 108.11  |
| N2   | C1   | H1   | 119.25  | N4   | C13  | C14  | 114.32  |
| N2   | C1   | C2   | 121.5   | N4   | C13  | C18  | 105.4   |
| H1   | C1   | C2   | 119.25  | H13  | C13  | C14  | 108.11  |
| C1   | C2   | H2   | 119.74  | H13  | C13  | C18  | 108.11  |
| C1   | C2   | C3   | 120.51  | C14  | C13  | C18  | 112.55  |
| H2   | C2   | C3   | 119.74  | C13  | C14  | H14A | 110.09  |
| C2   | C3   | H3   | 120.3   | C13  | C14  | H14B | 110.08  |
| C2   | C3   | C4   | 119.41  | C13  | C14  | C15  | 108.08  |
| H3   | C3   | C4   | 120.3   | H14A | C14  | H14B | 108.42  |
| C3   | C4   | C12  | 116.86  | H14A | C14  | C15  | 110.08  |
| C3   | C4   | C5   | 124.41  | H14B | C14  | C15  | 110.08  |
| C12  | C4   | C5   | 118.71  | C14  | C15  | H15A | 109.48  |
| N2   | C12  | C4   | 123.2   | C14  | C15  | H15B | 109.48  |
| N2   | C12  | C11  | 116.16  | C14  | C15  | C16  | 110.82  |
| C4   | C12  | C11  | 120.47  | H15A | C15  | H15B | 108.06  |
| N1   | C11  | C12  | 116.26  | H15A | C15  | C16  | 109.48  |
| N1   | C11  | C7   | 123.16  | H15B | C15  | C16  | 109.48  |
| C12  | C11  | C7   | 120.3   | C15  | C16  | H16A | 109.37  |
| C4   | C5   | H5   | 119.65  | C15  | C16  | H16B | 109.37  |
| C4   | C5   | C6   | 120.71  | C15  | C16  | C17  | 111.28  |
| H5   | C5   | C6   | 119.65  | H16A | C16  | H16B | 108     |
| C5   | C6   | H6   | 119.43  | H16A | C16  | C17  | 109.37  |
| C5   | C6   | C7   | 121.15  | H16B | C16  | C17  | 109.37  |
| H6   | C6   | C7   | 119.43  | C16  | C17  | H17A | 109.64  |
| C11  | C7   | C6   | 118.41  | C16  | C17  | H17B | 109.64  |
| C11  | C7   | C8   | 117.34  | C16  | C17  | C18  | 110.1   |
| C6   | C7   | C8   | 124.1   | H17A | C17  | H17B | 108.15  |
| C7   | C8   | H8   | 120.45  | H17A | C17  | C18  | 109.64  |
| C7   | C8   | C9   | 119.09  | H17B | C17  | C18  | 109.64  |
| H8   | C8   | C9   | 120.45  | N3   | C18  | C13  | 105.68  |
| C8   | C9   | H9   | 119.6   | N3   | C18  | C17  | 113.07  |
| C8   | C9   | C10  | 120.8   | N3   | C18  | H18  | 108.61  |
| H9   | C9   | C10  | 119.6   | C13  | C18  | C17  | 112.11  |
| N1   | C10  | C9   | 121.39  | C13  | C18  | H18  | 108.61  |
| N1   | C10  | H10  | 119.31  | C17  | C18  | H18  | 108.61  |
| C9   | C10  | H10  | 119.31  | HW1A | W1   | HW1B | 108.79  |
| PT   | N3   | H3A  | 109.68  | HW2A | W2   | HW2B | 108.34  |

Symmetry transformations used to generate equivalent atoms:

#1 x,y,z, #2 -x,1/2+y,-z

**Table S10:** Anisotropic Displacement Parameters ( $\text{\AA}^2 \times 10^3$ ) for [PHENSS]Cl<sub>2</sub>. The Anisotropic displacement factor exponent takes the form: -  
 $2\pi^2[h^2a^*2U_{11}+\dots+2hka \times b \times U_{12}]$ .

| Atom  | U <sub>11</sub> | U <sub>22</sub> | U <sub>33</sub> | U <sub>23</sub> | U <sub>13</sub> | U <sub>12</sub> |
|-------|-----------------|-----------------|-----------------|-----------------|-----------------|-----------------|
| Pt    | 12(1)           | 18(1)           | 13(1)           | -1(1)           | 0(1)            | 1(1)            |
| N(1)  | 15(1)           | 20(2)           | 22(1)           | -4(3)           | 0(1)            | -3(3)           |
| N(2)  | 19(1)           | 18(2)           | 16(1)           | 3(3)            | 2(1)            | -3(3)           |
| C(1)  | 20(1)           | 26(2)           | 21(1)           | 1(4)            | -1(1)           | -1(3)           |
| C(2)  | 30(2)           | 31(2)           | 21(1)           | -1(4)           | -6(1)           | -9(4)           |
| C(3)  | 41(2)           | 22(2)           | 15(1)           | -1(3)           | 2(1)            | -6(3)           |
| C(4)  | 31(2)           | 14(3)           | 22(2)           | -1(3)           | 7(1)            | -1(3)           |
| C(12) | 20(1)           | 11(2)           | 20(1)           | -3(3)           | 4(1)            | 1(2)            |
| C(11) | 17(1)           | 16(2)           | 23(1)           | -4(3)           | 4(1)            | 0(3)            |
| C(5)  | 36(2)           | 15(2)           | 25(2)           | -1(3)           | 14(1)           | -2(3)           |
| C(6)  | 30(2)           | 25(3)           | 36(2)           | -1(4)           | 18(1)           | -2(4)           |
| C(7)  | 22(1)           | 16(2)           | 36(2)           | -6(3)           | 8(1)            | -2(3)           |
| C(8)  | 14(1)           | 27(2)           | 50(2)           | -8(4)           | 6(1)            | 2(4)            |
| C(9)  | 18(1)           | 30(2)           | 44(2)           | -7(4)           | -5(1)           | 0(4)            |
| C(10) | 19(1)           | 33(2)           | 24(2)           | -10(4)          | -3(1)           | 1(4)            |
| N(3)  | 16(1)           | 23(2)           | 16(1)           | 2(3)            | 0(1)            | 0(3)            |
| N(4)  | 21(1)           | 31(2)           | 15(1)           | -7(3)           | -1(1)           | 4(3)            |
| C(13) | 22(2)           | 24(2)           | 19(2)           | 2(1)            | 1(1)            | 2(1)            |
| C(14) | 35(2)           | 40(6)           | 15(2)           | -3(2)           | 3(1)            | -1(2)           |
| C(15) | 41(3)           | 62(4)           | 19(2)           | 4(2)            | 11(2)           | -5(2)           |
| C(16) | 32(2)           | 52(4)           | 30(2)           | 0(4)            | 14(1)           | 2(4)            |
| C(17) | 20(1)           | 37(3)           | 26(2)           | 1(3)            | 7(1)            | -2(3)           |
| C(18) | 24(2)           | 25(4)           | 14(2)           | -1(2)           | 3(1)            | 3(2)            |
| Cl(1) | 38(1)           | 29(1)           | 40(1)           | 8(1)            | -21(1)          | -7(1)           |
| Cl(2) | 24(1)           | 24(1)           | 39(1)           | 0(1)            | -9(1)           | 0(1)            |
| W(1)  | 52(2)           | 33(2)           | 41(2)           | 6(2)            | -3(2)           | -2(2)           |

**Table S11:** Hydrogen Atom Coordinates ( $\text{\AA}^2 \times 10^4$ ) and Isotropic Displacement Parameters ( $\text{\AA}^2 \times 10^3$ ) for [PHENSS]Cl<sub>2</sub>.

| Atom   | <i>x</i> | <i>y</i> | <i>z</i> | U(eq) |
|--------|----------|----------|----------|-------|
| H(1)   | 6919     | 6909     | 289      | 34    |
| H(2)   | 6991     | 6816     | -1559    | 41    |
| H(3)   | 8730     | 6980     | -2342    | 39    |
| H(5)   | 10966    | 7037     | -2083    | 38    |
| H(6)   | 12574    | 6877     | -937     | 45    |
| H(8)   | 13448    | 6846     | 998      | 45    |
| H(9)   | 13125    | 6822     | 2794     | 46    |
| H(10)  | 11260    | 6855     | 3373     | 38    |
| H(3A)  | 6647     | 7604     | 2080     | 27    |
| H(3B)  | 6757     | 5589     | 2360     | 27    |
| H(4A)  | 9501     | 6130     | 4088     | 34    |
| H(4B)  | 9073     | 8088     | 4093     | 34    |
| H(13)  | 7742     | 4846     | 4165     | 33    |
| H(14A) | 7860     | 7874     | 5677     | 45    |
| H(14B) | 8347     | 5803     | 5894     | 45    |
| H(15A) | 6465     | 4525     | 5686     | 60    |
| H(15B) | 6488     | 6088     | 6587     | 60    |
| H(16A) | 5672     | 8326     | 5369     | 56    |
| H(16B) | 4854     | 6544     | 5422     | 56    |
| H(17A) | 5521     | 5357     | 3820     | 41    |

**Table S12:** Torsion Angles for [PHENSS]Cl<sub>2</sub>.

| A   | B  | C   | D   | Angle/° | A   | B   | C   | D    | Angle/° |
|-----|----|-----|-----|---------|-----|-----|-----|------|---------|
| N2  | PT | N1  | C11 | -1.48   | C11 | C7  | C8  | C9   | -3.32   |
| N2  | PT | N1  | C10 | -177.96 | C6  | C7  | C8  | H8   | 1.23    |
| N3  | PT | N1  | C11 | 53.08   | C6  | C7  | C8  | C9   | -178.77 |
| N3  | PT | N1  | C10 | -123.4  | C7  | C8  | C9  | H9   | -179.39 |
| N4  | PT | N1  | C11 | 179.08  | C7  | C8  | C9  | C10  | 0.61    |
| N4  | PT | N1  | C10 | 2.6     | H8  | C8  | C9  | H9   | 0.61    |
| N1  | PT | N2  | C1  | -178.5  | H8  | C8  | C9  | C10  | -179.39 |
| N1  | PT | N2  | C12 | -1.56   | C8  | C9  | C10 | N1   | 0.14    |
| N3  | PT | N2  | C1  | 2.79    | C8  | C9  | C10 | H10  | -179.86 |
| N3  | PT | N2  | C12 | 179.73  | H9  | C9  | C10 | N1   | -179.86 |
| N4  | PT | N2  | C1  | -125.98 | H9  | C9  | C10 | H10  | 0.14    |
| N4  | PT | N2  | C12 | 50.96   | PT  | N3  | C18 | C13  | -41.31  |
| N1  | PT | N3  | H3A | -99.56  | PT  | N3  | C18 | C17  | -164.3  |
| N1  | PT | N3  | H3B | 19.11   | PT  | N3  | C18 | H18  | 75.07   |
| N1  | PT | N3  | C18 | 139.77  | H3A | N3  | C18 | C13  | -161.97 |
| N2  | PT | N3  | H3A | -45.19  | H3A | N3  | C18 | C17  | 75.04   |
| N2  | PT | N3  | H3B | 73.48   | H3A | N3  | C18 | H18  | -45.59  |
| N2  | PT | N3  | C18 | -165.85 | H3B | N3  | C18 | C13  | 79.36   |
| N4  | PT | N3  | H3A | 134.26  | H3B | N3  | C18 | C17  | -43.63  |
| N4  | PT | N3  | H3B | -107.07 | H3B | N3  | C18 | H18  | -164.26 |
| N4  | PT | N3  | C18 | 13.6    | PT  | N4  | C13 | H13  | 70.65   |
| N1  | PT | N4  | H4A | -40.33  | PT  | N4  | C13 | C14  | -168.9  |
| N1  | PT | N4  | H4B | 78.51   | PT  | N4  | C13 | C18  | -44.78  |
| N1  | PT | N4  | C13 | -160.91 | H4A | N4  | C13 | H13  | -49.93  |
| N2  | PT | N4  | H4A | -92.77  | H4A | N4  | C13 | C14  | 70.52   |
| N2  | PT | N4  | H4B | 26.07   | H4A | N4  | C13 | C18  | -165.36 |
| N2  | PT | N4  | C13 | 146.65  | H4B | N4  | C13 | H13  | -168.77 |
| N3  | PT | N4  | H4A | 138.39  | H4B | N4  | C13 | C14  | -48.32  |
| N3  | PT | N4  | H4B | -102.77 | H4B | N4  | C13 | C18  | 75.8    |
| N3  | PT | N4  | C13 | 17.81   | N4  | C13 | C14 | H14A | 56.44   |
| PT  | N1 | C11 | C12 | 4.23    | N4  | C13 | C14 | H14B | -63.03  |
| PT  | N1 | C11 | C7  | 178.14  | N4  | C13 | C14 | C15  | 176.7   |
| C10 | N1 | C11 | C12 | -178.86 | H13 | C13 | C14 | H14A | 176.88  |
| C10 | N1 | C11 | C7  | -4.95   | H13 | C13 | C14 | H14B | 57.42   |
| PT  | N1 | C10 | C9  | 178.27  | H13 | C13 | C14 | C15  | -62.85  |
| PT  | N1 | C10 | H10 | -1.73   | C18 | C13 | C14 | H14A | -63.77  |
| C11 | N1 | C10 | C9  | 1.94    | C18 | C13 | C14 | H14B | 176.76  |
| C11 | N1 | C10 | H10 | -178.07 | C18 | C13 | C14 | C15  | 56.49   |
| PT  | N2 | C1  | H1  | 0.35    | N4  | C13 | C18 | N3   | 55.58   |
| PT  | N2 | C1  | C2  | -179.65 | N4  | C13 | C18 | C17  | 179.17  |
| C12 | N2 | C1  | H1  | -176.46 | N4  | C13 | C18 | H18  | -60.8   |
| C12 | N2 | C1  | C2  | 3.54    | H13 | C13 | C18 | N3   | -59.85  |
| PT  | N2 | C12 | C4  | 179.53  | H13 | C13 | C18 | C17  | 63.74   |
| PT  | N2 | C12 | C11 | 4.3     | H13 | C13 | C18 | H18  | -176.23 |
| C1  | N2 | C12 | C4  | -3.19   | C14 | C13 | C18 | N3   | -179.19 |
| C1  | N2 | C12 | C11 | -178.42 | C14 | C13 | C18 | C17  | -55.6   |
| N2  | C1 | C2  | H2  | 176.58  | C14 | C13 | C18 | H18  | 64.43   |
| N2  | C1 | C2  | C3  | -3.42   | C13 | C14 | C15 | H15A | 62.61   |
| H1  | C1 | C2  | H2  | -3.42   | C13 | C14 | C15 | H15B | -179.1  |

**Table S12:** Torsion Angles for [PHENSS]Cl<sub>2</sub> continued.

| A   | B   | C   | D   | Angle/° | A    | B   | C   | D    | Angle/° |
|-----|-----|-----|-----|---------|------|-----|-----|------|---------|
| H1  | C1  | C2  | C3  | 176.58  | C13  | C14 | C15 | C16  | -58.24  |
| C1  | C2  | C3  | H3  | -177.31 | H14A | C14 | C15 | H15A | -177.12 |
| C1  | C2  | C3  | C4  | 2.69    | H14A | C14 | C15 | H15B | -58.83  |
| H2  | C2  | C3  | H3  | 2.69    | H14A | C14 | C15 | C16  | 62.03   |
| H2  | C2  | C3  | C4  | -177.31 | H14B | C14 | C15 | H15A | -57.65  |
| C2  | C3  | C4  | C12 | -2.22   | H14B | C14 | C15 | H15B | 60.63   |
| C2  | C3  | C4  | C5  | 179.11  | H14B | C14 | C15 | C16  | -178.51 |
| H3  | C3  | C4  | C12 | 177.78  | C14  | C15 | C16 | H16A | -61.63  |
| H3  | C3  | C4  | C5  | -0.89   | C14  | C15 | C16 | H16B | -179.72 |
| C3  | C4  | C12 | N2  | 2.51    | C14  | C15 | C16 | C17  | 59.32   |
| C3  | C4  | C12 | C11 | 177.55  | H15A | C15 | C16 | H16A | 177.51  |
| C5  | C4  | C12 | N2  | -178.74 | H15A | C15 | C16 | H16B | 59.42   |
| C5  | C4  | C12 | C11 | -3.71   | H15A | C15 | C16 | C17  | -61.53  |
| C3  | C4  | C5  | H5  | 1.74    | H15B | C15 | C16 | H16A | 59.22   |
| C3  | C4  | C5  | C6  | -178.26 | H15B | C15 | C16 | H16B | -58.87  |
| C12 | C4  | C5  | H5  | -176.91 | H15B | C15 | C16 | C17  | -179.82 |
| C12 | C4  | C5  | C6  | 3.09    | C15  | C16 | C17 | H17A | 64.97   |
| N2  | C12 | C11 | N1  | -5.75   | C15  | C16 | C17 | H17B | -176.43 |
| N2  | C12 | C11 | C7  | -179.85 | C15  | C16 | C17 | C18  | -55.73  |
| C4  | C12 | C11 | N1  | 178.88  | H16A | C16 | C17 | H17A | -174.07 |
| C4  | C12 | C11 | C7  | 4.78    | H16A | C16 | C17 | H17B | -55.48  |
| N1  | C11 | C7  | C6  | -178.63 | H16A | C16 | C17 | C18  | 65.22   |
| N1  | C11 | C7  | C8  | 5.65    | H16B | C16 | C17 | H17A | -55.98  |
| C12 | C11 | C7  | C6  | -4.96   | H16B | C16 | C17 | H17B | 62.61   |
| C12 | C11 | C7  | C8  | 179.32  | H16B | C16 | C17 | C18  | -176.69 |
| C4  | C5  | C6  | H6  | 176.55  | C16  | C17 | C18 | N3   | 172.8   |
| C4  | C5  | C6  | C7  | -3.45   | C16  | C17 | C18 | C13  | 53.45   |
| H5  | C5  | C6  | H6  | -3.45   | C16  | C17 | C18 | H18  | -66.57  |
| H5  | C5  | C6  | C7  | 176.55  | H17A | C17 | C18 | N3   | 52.1    |
| C5  | C6  | C7  | C11 | 4.38    | H17A | C17 | C18 | C13  | -67.25  |
| C5  | C6  | C7  | C8  | 179.78  | H17A | C17 | C18 | H18  | 172.73  |
| H6  | C6  | C7  | C11 | -175.62 | H17B | C17 | C18 | N3   | -66.5   |
| H6  | C6  | C7  | C8  | -0.22   | H17B | C17 | C18 | C13  | 174.16  |
| C11 | C7  | C8  | H8  | 176.68  | H17B | C17 | C18 | H18  | 54.13   |

### General assignment of ancillary ligand in metallointercalators of the type $[\text{Pt}(\text{I}_L)(\text{DACP})]^{2+}$

The unambiguous assignment of all the proton resonances in the  $^1\text{H}$  NMR of these metallointercalators can be difficult. Such difficulty arises from the spatial arrangement of the geminal protons being either in axial or equatorial positions (Fig. S1). A DEPT experiment was used to determine the primary ( $-\text{CH}$ ) and secondary carbon ( $-\text{CH}_2$ ) atoms (Fig. S2) of the RRDACP in  $[\text{Pt}(\text{RRDACP})\text{Cl}_2]$ . The two resonances were observed at 23 ppm which were assigned as  $-\text{CH}_2$  of C3 and C5 as they were out of phase with the resonance at 67 ppm which was assigned  $-\text{CH}$  (Table 13 and Fig. S2). Also of note for the DEPT spectra of RRDACP was that the signal at 26 ppm indicative of the C4. A small peak at 69 ppm and the small shoulder visible on the side of the two resonances at 23 ppm are attributed to uncoordinated RRDACP or exchange of the Cl ligand with the  $\text{DMSO}-d_6$  solvent. C4 being further from the coordination appears to be coincident with the C4 of the coordinated RRDACP.

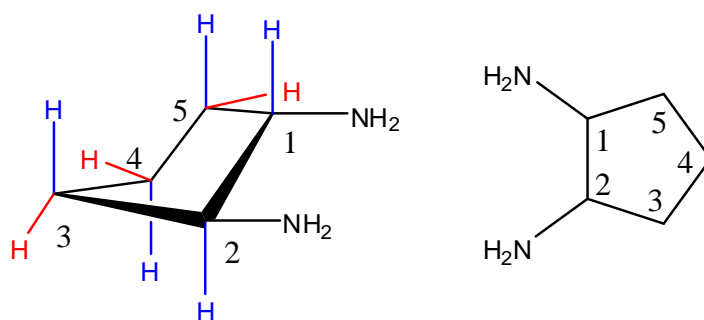

**Fig. S1:** The chemical structure and numbering system of DACP (right) showing half chair conformation and labelling of the proton resonances. Axial hydrogens are represented in blue and equatorial hydrogens are represented in red.

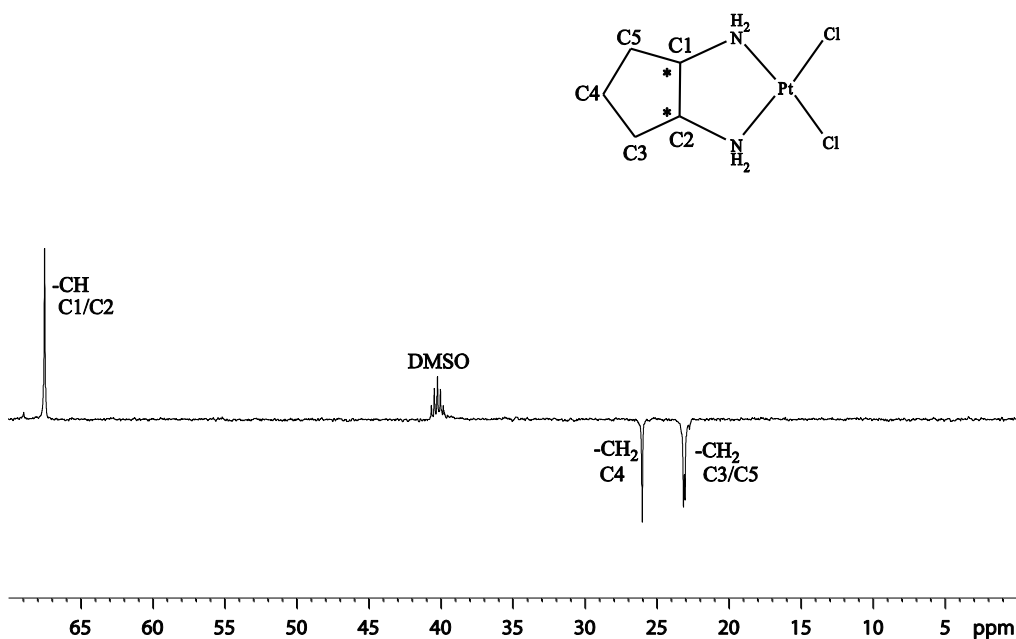

**Fig. S2:** The DEPT spectra and the chemical structure of  $[\text{Pt}(\text{RRDACP})\text{Cl}_2]$  with carbon resonances labelled and the  $-\text{CH}$  and  $-\text{CH}_2$  resonances labelled.

**Table S13:** The summary of  $^1\text{H}$  NMR data of complexes of the type  $[\text{Pt}(\text{A}_L)\text{Cl}_2]$  showing chemical shift (ppm), multiplicity (s, d, dd, t, m and bs), integration and coupling constants (Hz) between the five complexes synthesised.

| Resonance         | $[\text{Pt}(\text{en})\text{Cl}_2]^{\#}$ | $[\text{Pt}(\text{SSDACH})\text{Cl}_2]^{\#}$ | $[\text{Pt}(\text{SSDACP})\text{Cl}_2]$ | $[\text{Pt}(\text{RRDACP})\text{Cl}_2]$ |
|-------------------|------------------------------------------|----------------------------------------------|-----------------------------------------|-----------------------------------------|
| $-\text{NH}_2$    | 6.4 (bs, 2H)                             | 5.6 (bs, 2H)                                 | 5.2 (bs, 2H)                            | 5.2 (bs, 2H)                            |
| $-\text{NH}_2$    | 6.1 (bs, 2H)                             | 5.0 (bs, 2H)                                 | 5.0 (bs, 2H)                            | 5.1 (bs, 2H)                            |
| H1'/H2'           | 2.61 (s, 4H)                             | 2.2 (t, 2H, $J = 7.6$ Hz)                    | 3.1 (bs, 2H)                            | 3.0 (bs, 2H)                            |
| H3'/H6'           | -                                        | 1.9 (d, 1H, $J = 12.1$ Hz)                   | -                                       | -                                       |
| H4'/H5'           | -                                        | 1.5 (d, 1H, $J = 8.5$ Hz)                    | -                                       | -                                       |
| H3'/H6'           | -                                        | 1.3 (d, 1H, $J = 8.9$ Hz)                    | -                                       | -                                       |
| H4'/H5'           | -                                        | 1.0 (t, 1H, $J = 9.9$ Hz)                    | -                                       | -                                       |
| H4'/H4'           | -                                        | -                                            | 2.1 (m, 2H)                             | 2.1 (m, 2H)                             |
| H3'/H5'           | -                                        | -                                            | 1.6 (m, 2H)                             | 1.5 (m, 2H)                             |
| H3'/H5'           | -                                        | -                                            | 1.4 (m, 2H)                             | 1.4 (m, 2H)                             |
| $^{195}\text{Pt}$ | -3309                                    | -3282                                        | -3065                                   | -3069                                   |

$\#$  included for comparison

Once the  $-\text{CH}$  resonance was identified, it was then used in conjunction with the results of a  $^1\text{H}$ - $^{13}\text{C}$  HMQC experiment to assign the proton label H1'/H2' to a resonance (Fig. S2). From this it was seen that the resonance that corresponded to the proton of the  $-\text{CH}$  was the resonance that was the furthest downfield at 3.0 ppm. This is likely due to its



close proximity to the amine groups, causing them to be deshielded and hence producing a downfield shift.

A COSY experiment was used to assign the proton resonances (Fig. S3) of [Pt(RRDACP)Cl<sub>2</sub>] complex. The resonance at 3.03 ppm corresponds to the –CH resonance in the DEPT spectra and as such was assigned to represent the proton H1'/H2' of the RRDACP ancillary ligand. The resonance H1'/H2' shares a cross-peak with the resonances at 1.5 and 1.4 ppm. The two resonances being associated with two different protons can also be seen in the HMQC spectra. In this case the two different carbon resonances at 23 ppm correlated to the resonance at 1.5 and 1.4 ppm. The resonance at 1.5 ppm was assigned to the proton H3'/H5' and the resonance at 1.4 ppm assigned as H3'/H5'. Both H3'/H5' and H3'/H5' share a cross-peak with the resonance at 2.1 ppm and as such it was assigned as H4'.

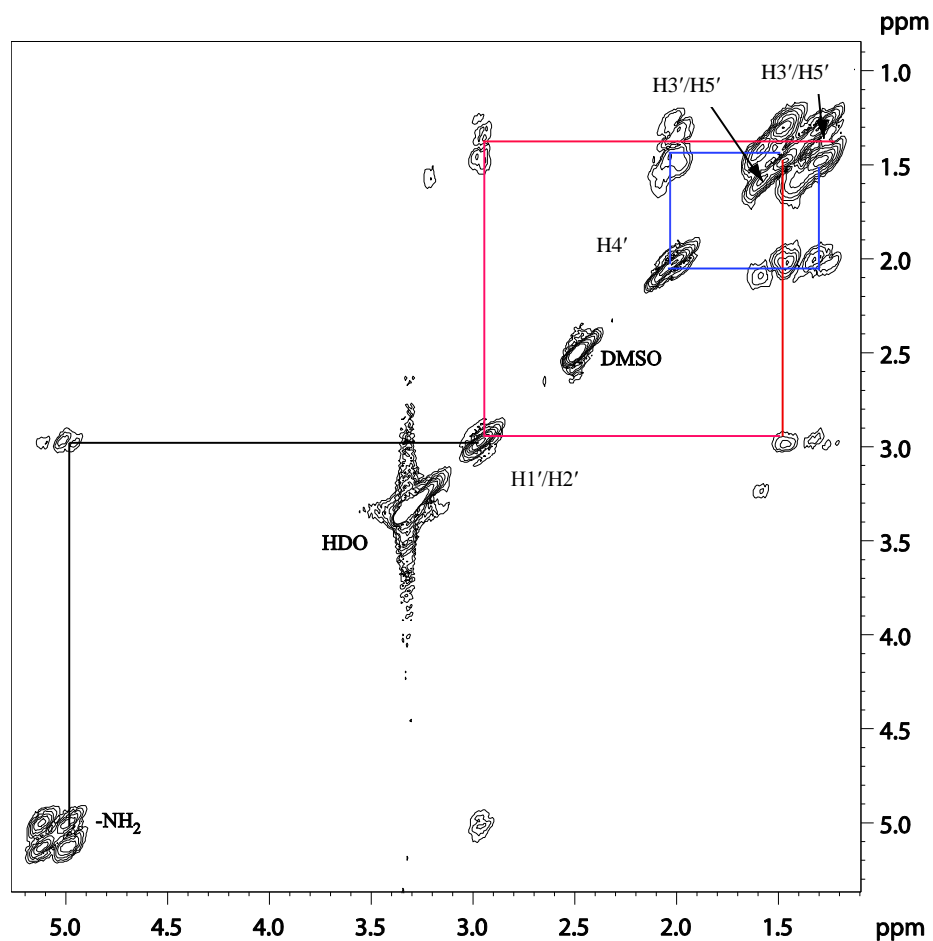

**Fig. S3:** An expansion of the 2D COSY spectrum of [Pt(RRDACP)Cl<sub>2</sub>] obtained at 35 °C in DMSO-*d*<sub>6</sub> and referenced to the residual solvent peak showing the labelling of cross-peak correlation between resonances.

The <sup>1</sup>H NMR spectrum of [Pt(RRDACP)Cl<sub>2</sub>] was assigned according to the proton labelling system as shown in Fig. S4. The spectrum was initially recorded in DMSO-*d*<sub>6</sub> to observe the amine resonance. A drop of D<sub>2</sub>O was added, causing the amine resonances to disappear due to exchange of the protons (not shown). The broad resonance at 5.1 ppm was assigned to represent the amines of the [Pt(RRDACP)Cl<sub>2</sub>]. The protons H1' and H2' were observed at 3.0 ppm, which had shifted upfield when compared to the uncoordinated ancillary ligand as a result of the coordination of the adjacent amines. The proton H4' was observed at 2.1 ppm. The protons H3'/H5' were observed at 1.5 ppm and 1.4 ppm. The amine resonances shared a cross-peak with the resonance at 3.0 ppm and were hence assigned to represent the protons H1'/H2'. Cross-peak correlation was

observed from the resonance assigned H1'/H2' with resonances at 1.5 and 1.4 ppm of the H3'/H5' protons. The H3'/H5' protons both shared cross-peaks with the resonance at 2.1 ppm and was therefore assigned to represent the proton H4'.

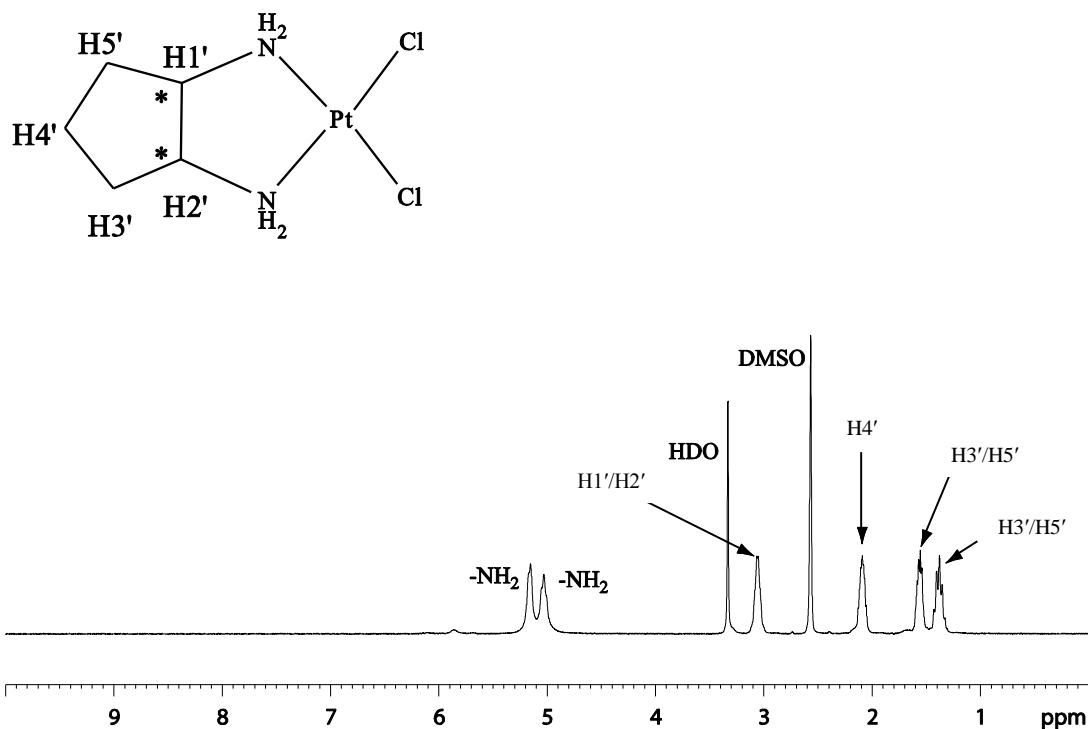

**Fig. S4:** The chemical structure and <sup>1</sup>H NMR spectrum of [Pt(RRDACP)Cl<sub>2</sub>] obtained at 35 °C in DMSO-*d*<sub>6</sub> showing the proton labelling system and assignment of proton resonances.

The  $^{195}\text{Pt}$  NMR spectrum of the complex  $[\text{Pt}(\text{RRDACP})\text{Cl}_2]$  (Fig. S5) shows one broad resonance at -3065 ppm indicating the presence of only one platinum species. The platinum resonance was in accordance with the expected shift of a nuclei coordinated to both chloride and amine ligands. When compared to the starting material which has a chemical shift of -1650 ppm a good indication is provided that the coordination sphere has changed. This process was used to assign both enantiomers of the DACP ligand coordinated to the platinum nuclei.

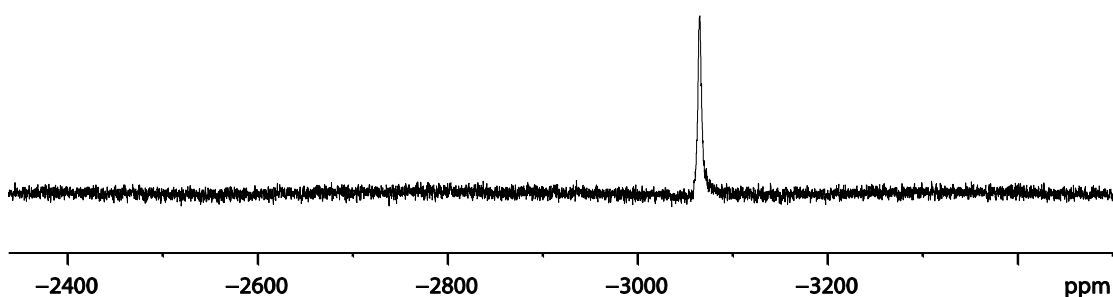

**Fig. S5:** The  $^{195}\text{Pt}$  NMR spectrum of  $[\text{Pt}(\text{RRDACP})\text{Cl}_2]$  obtained at 35 °C in  $\text{DMSO-}d_6$ .

#### General assignment of $\text{I}_L$ for $[\text{Pt}(\text{I}_L)(\text{A}_L)]^{2+}$

COSY spectra (Fig. S6) of metallointercalators were used in combination with  $J$ -coupling constants and resonance multiplicity to assign protons to their corresponding resonances in the  $^1\text{H}$  NMR spectra. The numbering system for the proton resonances of  $\text{I}_L$  are shown in Fig. S1. The methodology for assigning all protons of the DACP complexes is illustrated using **9**. The change in chemical shift between the complexes  $\text{RRDACP}$ ,  $[\text{Pt}(\text{RRDACP})\text{Cl}_2]$  and **9** is shown graphically in Fig. S8.

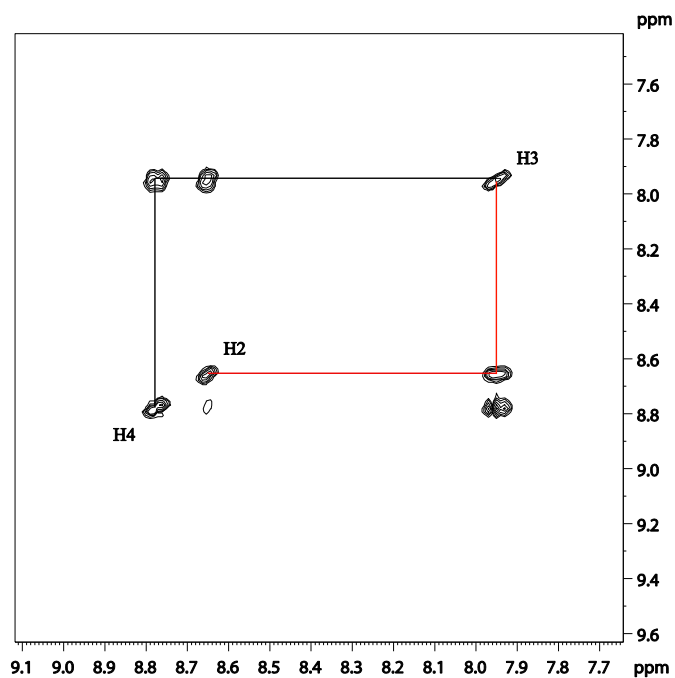

**Fig. S6:** An expansion of the 2D COSY spectrum of **9** obtained at 25 °C in D<sub>2</sub>O and referenced to the residual solvent peak showing the labelling of cross-peak correlation between resonances.

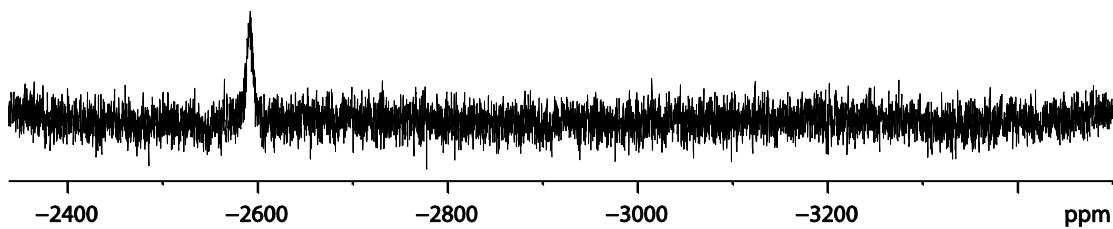

**Fig. S7:** The <sup>195</sup>Pt NMR spectrum of **9** obtained at 25 °C in D<sub>2</sub>O.

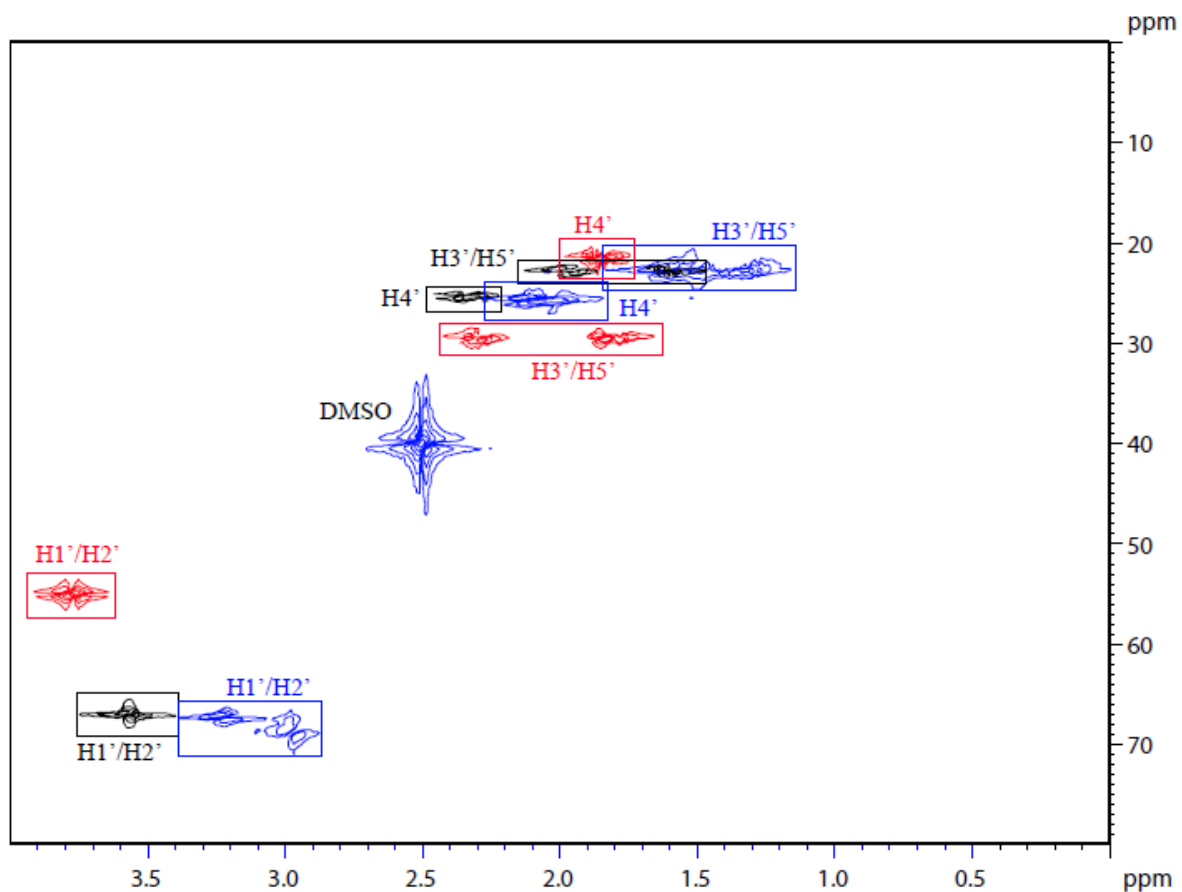

**Fig. S8:** HMQC comparison of RRDACP (red), [Pt(RRDACP)Cl<sub>2</sub>] (blue) and **9** (black) showing the shift in resonance that occur once the ancillary and intercalating ligands have coordinated to the platinum.
